# Supplementary material for: Influence of photooxidation on the lipid profile of rapeseed oil using UHPLC-QTOF-MS and multivariate data analysis
Source: Royal Society of Chemistry journal article supplement (doi:10.1039/c9ay00385a), 2019-01-01
Supplement: c9ay00385a1.pdf [file c9ay00385a1.pdf]

### Supplementary information

**Figure S1** Acid value, peroxide value, p-Anisidine value and color changes( $\Delta E$ ) of oils during storage

**Figure S2** PCA score map. The green point is the QC samples and the blue point is the official experimental sample. (a) positive mode; (c) negative mode

PCA-X one-dimensional distribution map of QC samples. (b) positive mode; (d) negative mode

**Figure S3** Correlation analysis of QC samples. (a) positive mode; (b) negative mode

**Figure S4** Changes of main TG and DG species during light oxidation

**Figure S5** Changes of relative content of the phospholipids in rapeseed oil samples during light oxidation (% total PL)

Figure S1

(a)

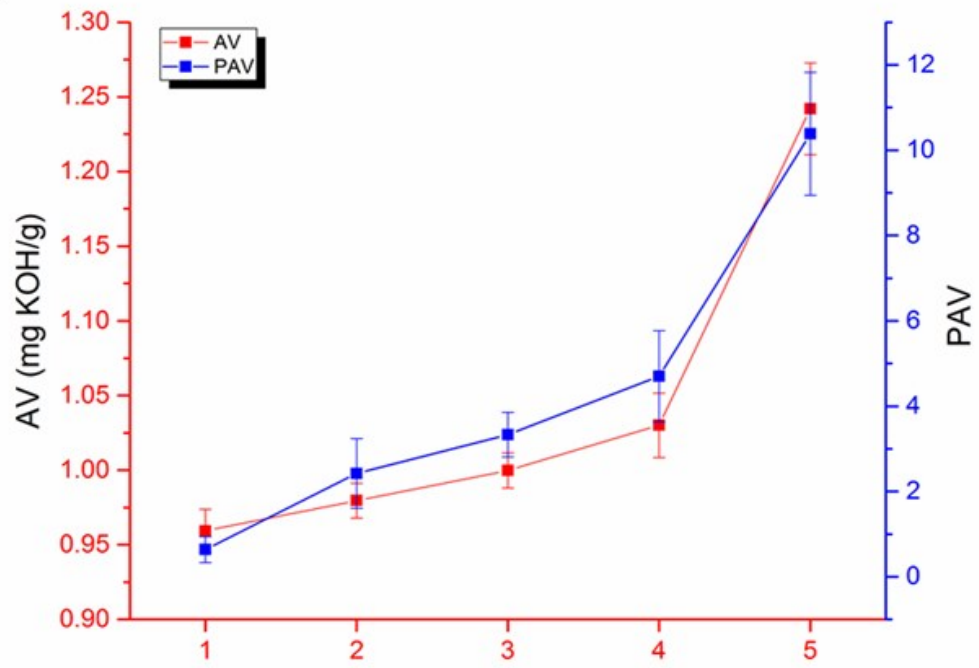

(b)

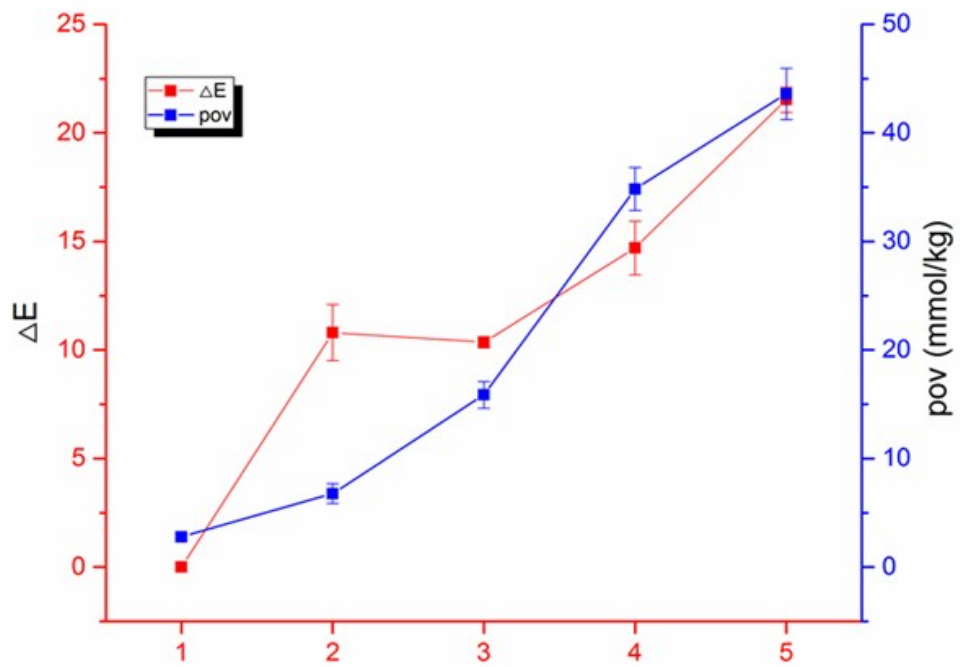

Figure S2

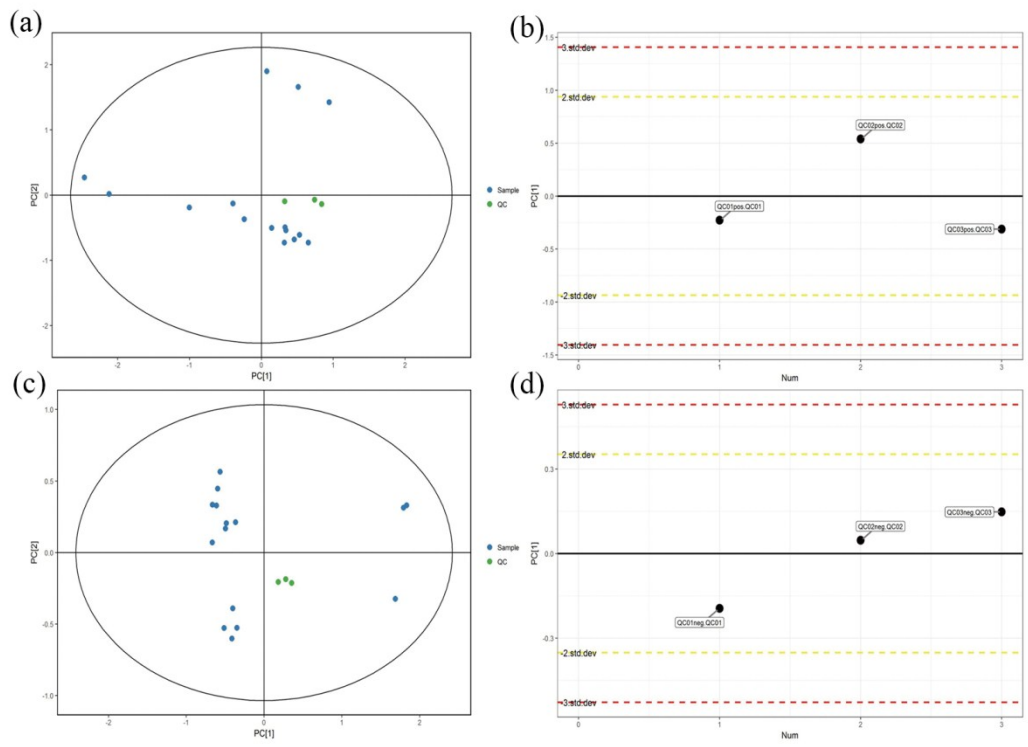

Figure S3

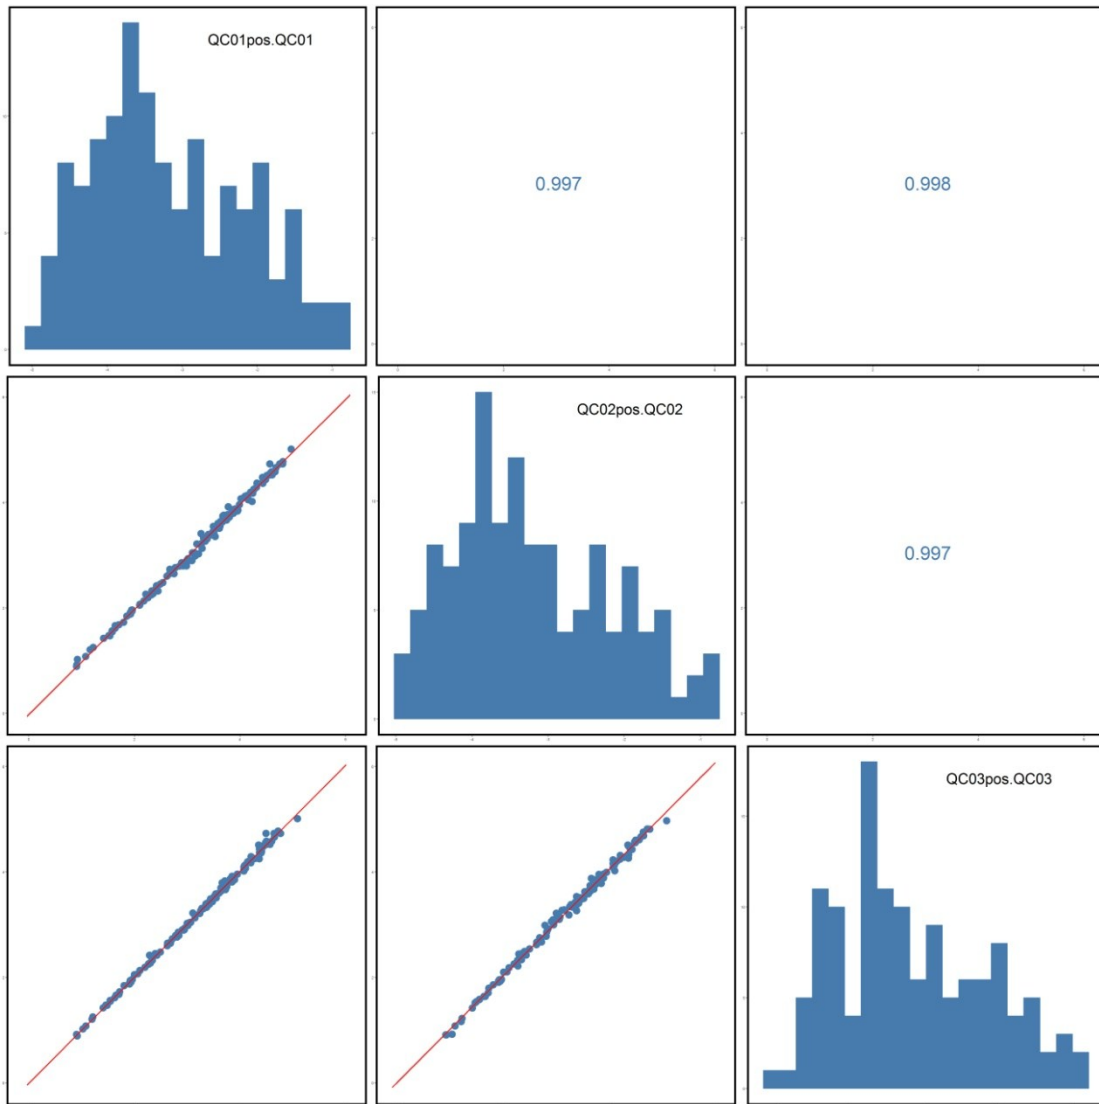

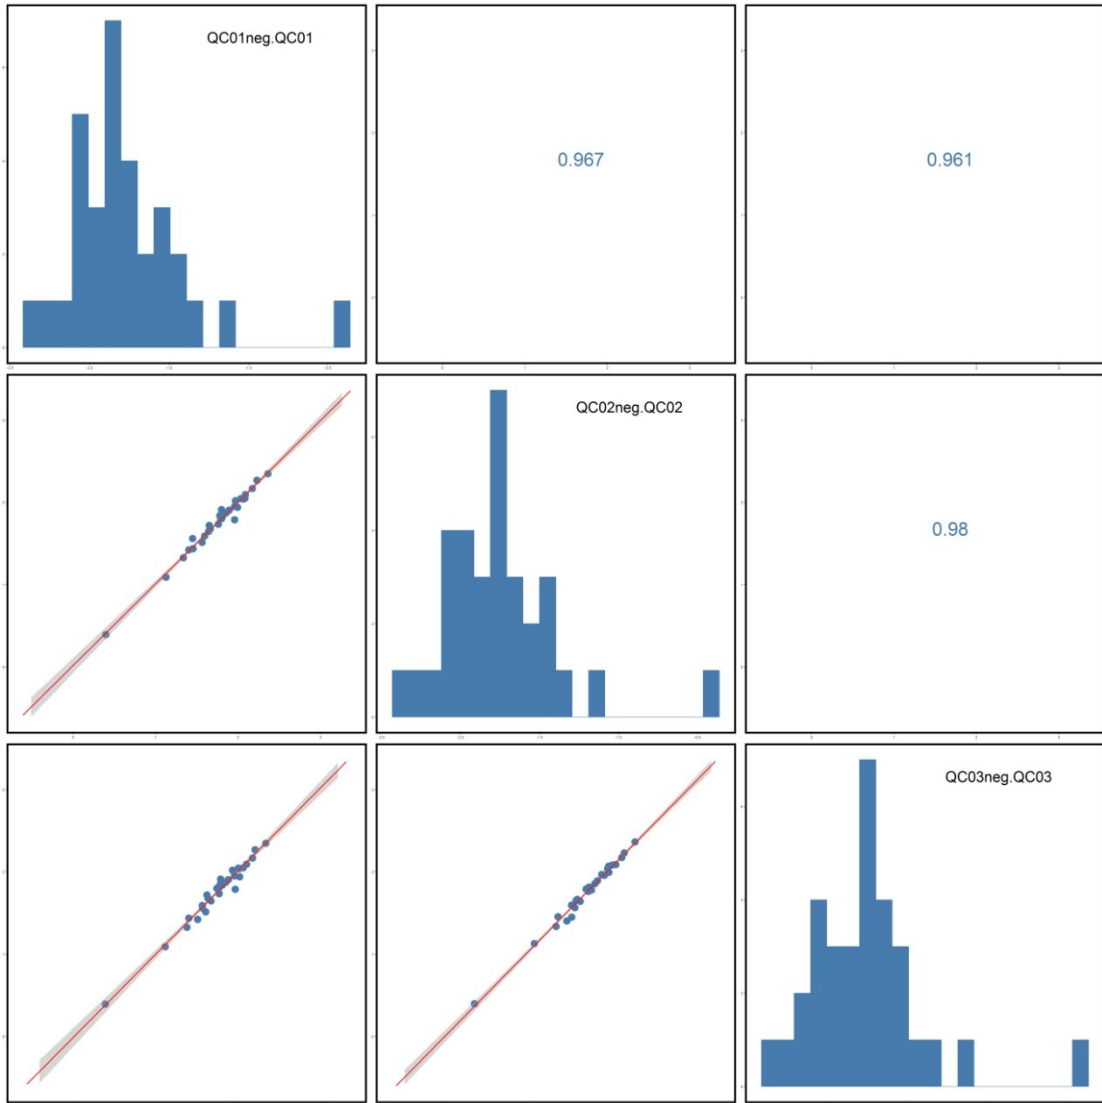

Figure S4

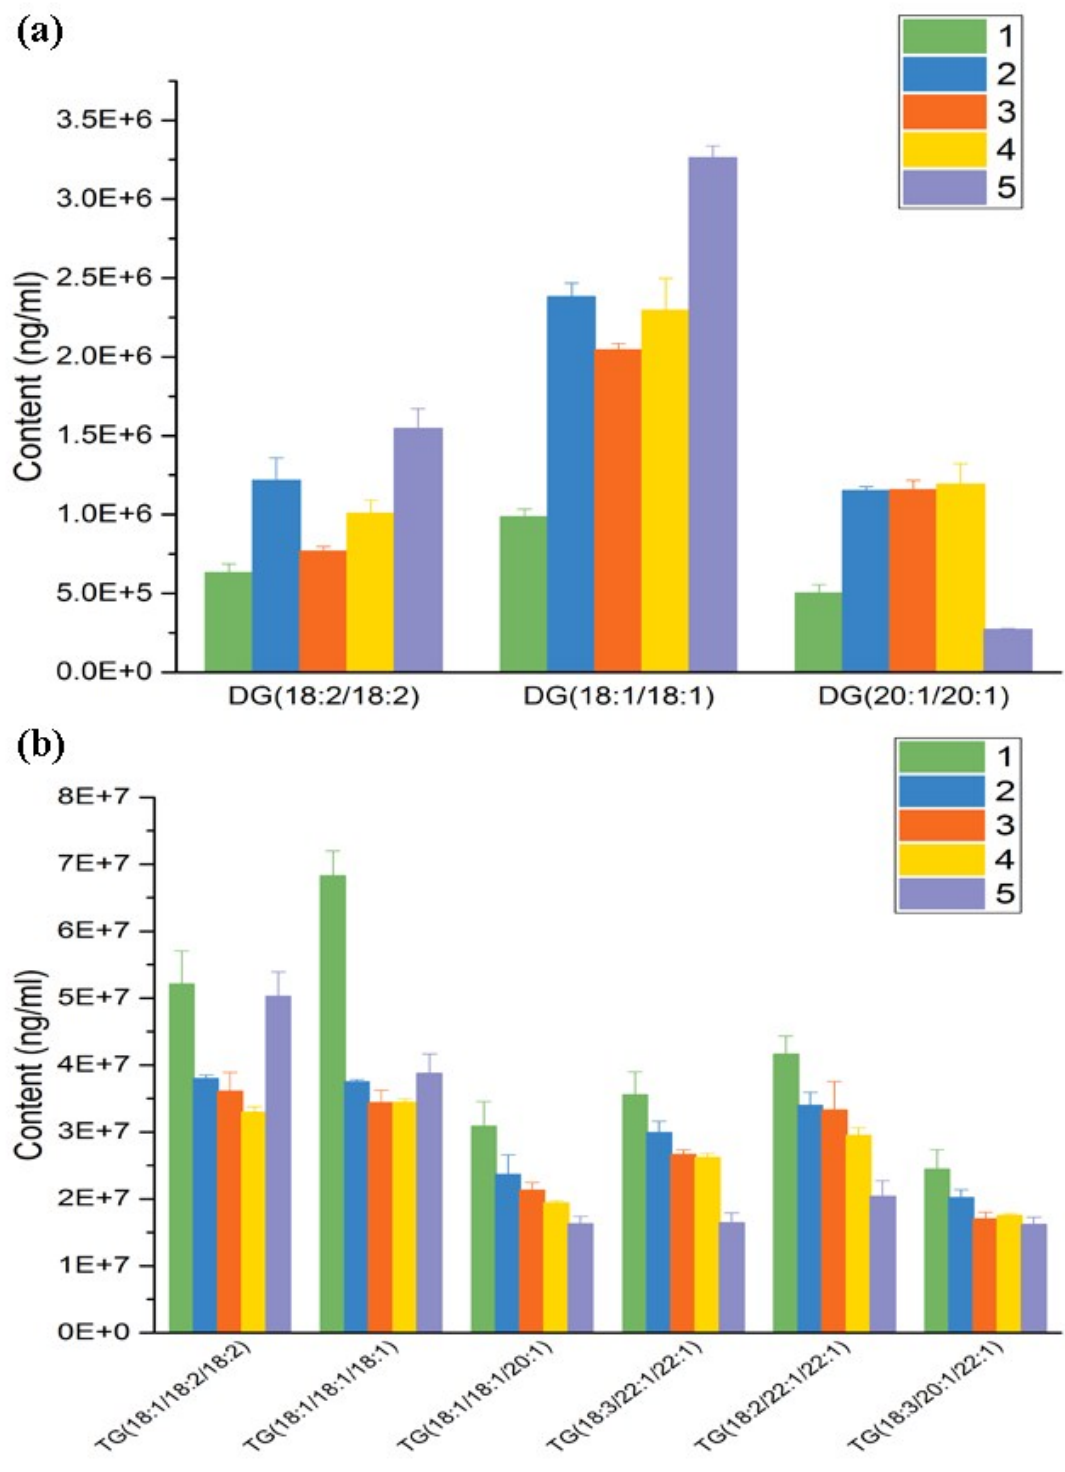

**Figure S5**

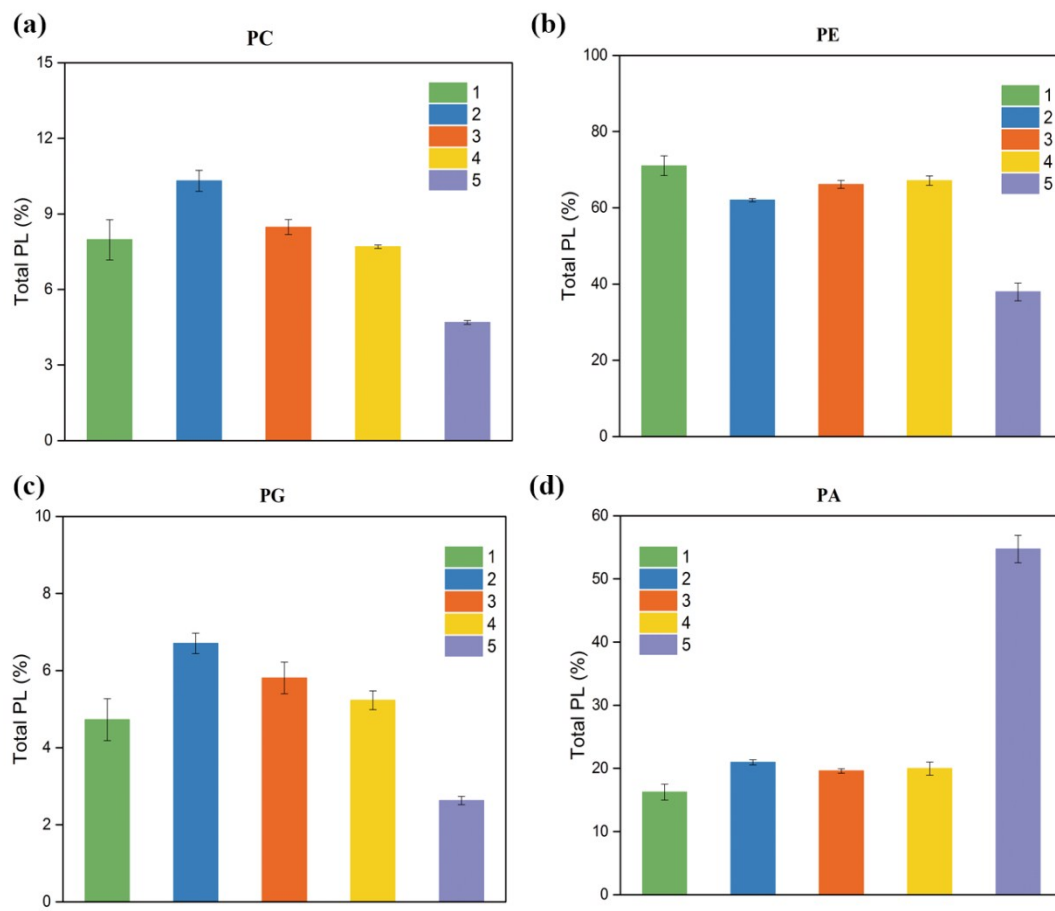

**Table S1** Qualitative and quantitative results of lipid composition in rapeseed oil by UHPLC-QTOF-MS

| MS2 name           | type        | mzmed       | time        | ng/ml       | RSD    |
|--------------------|-------------|-------------|-------------|-------------|--------|
| DG(16:0/16:0)      | MS2 forward | 586.5379826 | 7.607916667 | 11490.46535 | 7.59%  |
| DG(15:0/18:2)      | MS2 forward | 596.530708  | 7.685708333 | 9016.860269 | 5.94%  |
| DG(18:2/17:1)      | MS2 forward | 622.5467425 | 7.735025    | 42254.54476 | 4.51%  |
| DG(18:2/18:2)      | MS2 reverse | 634.5404173 | 6.734491667 | 1306085.507 | 5.39%  |
| DG(18:1/18:1)      | MS2 reverse | 638.5723726 | 7.733933333 | 2754286.466 | 5.60%  |
| DG(18:0/18:0)      | MS2 reverse | 642.591148  | 8.2549      | 7483.339274 | 5.03%  |
| DG(18:3/19:0)      | MS2 reverse | 650.5686163 | 7.239866667 | 6026.86637  | 7.87%  |
| DG(20:1/18:3)      | MS2 forward | 662.5622154 | 6.734666667 | 8480.928471 | 6.94%  |
| DG(16:0/22:1)      | MS2 forward | 668.6169485 | 8.755583333 | 62838.96811 | 6.14%  |
| DG(20:1/20:1)      | MS2 reverse | 694.6346122 | 8.777475    | 1106595.278 | 5.60%  |
| DG(20:1/22:1)      | MS2 forward | 722.6545325 | 8.798833333 | 10872.77888 | 14.86% |
| DG(20:0/22:1)      | MS2 forward | 724.6699744 | 9.2148      | 23191.19964 | 2.79%  |
| DG(22:1/22:1)      | MS2 forward | 750.6941116 | 9.62385     | 147083.7842 | 5.29%  |
| TG(12:0/12:0/16:0) | MS2 forward | 712.642457  | 9.470275    | 5264.796519 | 5.19%  |
| TG(12:0/14:0/16:0) | MS2 forward | 740.6728779 | 9.84585     | 9028.038367 | 4.02%  |
| TG(14:1/16:1/16:1) | MS2 reverse | 790.6800749 | 9.229033333 | 5262.253102 | 5.57%  |
| TG(12:0/18:1/16:1) | MS2 reverse | 792.7058616 | 9.912366667 | 85723.86707 | 6.94%  |
| TG(14:0/16:0/16:1) | MS2 reverse | 794.7110445 | 9.904383333 | 12298.55891 | 5.09%  |
| TG(14:0/16:0/16:0) | MS2 forward | 796.7351956 | 10.53320833 | 11094.73191 | 7.79%  |
| TG(16:1/16:1/16:1) | MS2 reverse | 818.711665  | 9.641133333 | 8394.353759 | 6.54%  |
| TG(14:0/16:0/18:1) | MS2 forward | 822.7513771 | 10.57523333 | 56622.11384 | 1.11%  |
| TG(16:0/16:0/16:0) | MS2 forward | 824.7581816 | 10.57326667 | 9276.925368 | 1.57%  |
| TG(14:0/16:0/18:0) | MS2 reverse | 824.7653907 | 10.85793333 | 13724.88904 | 9.19%  |
| TG(16:1/16:1/17:2) | MS2 reverse | 830.7193015 | 9.888108333 | 16602.27463 | 4.75%  |
| TG(16:1/16:1/17:1) | MS2 reverse | 832.7352607 | 10.18634167 | 33387.96117 | 0.49%  |
| TG(16:1/16:1/17:0) | MS2 reverse | 834.750699  | 10.46978333 | 40524.54786 | 4.85%  |
| TG(16:0/16:0/17:1) | MS2 forward | 836.7655519 | 10.72765833 | 16566.74366 | 7.05%  |
| TG(16:0/16:1/18:3) | MS2 forward | 844.7378887 | 10.04344167 | 465975.9912 | 3.49%  |
| TG(16:0/16:1/18:2) | MS2 forward | 846.7536005 | 10.325375   | 967103.0606 | 2.84%  |
| TG(16:0/16:0/18:1) | MS2 forward | 850.7835079 | 10.86803333 | 621401.8596 | 2.89%  |
| TG(16:0/16:0/18:0) | MS2 reverse | 852.7890614 | 10.877675   | 105590.4177 | 5.22%  |
| TG(16:0/17:2/18:3) | MS2 reverse | 856.7364717 | 9.93895     | 71242.01325 | 5.42%  |
| TG(16:0/17:1/18:3) | MS2 reverse | 858.7523596 | 10.21741667 | 127509.0829 | 2.27%  |
| TG(17:1/17:1/17:1) | MS2 reverse | 860.757383  | 10.19838333 | 23960.46546 | 2.31%  |
| TG(16:0/17:0/18:3) | MS2 reverse | 860.7669946 | 10.49921667 | 190354.2623 | 9.25%  |
| TG(16:0/17:1/18:1) | MS2 forward | 862.7818265 | 10.74958333 | 117576.4447 | 4.41%  |
| TG(16:0/17:0/18:1) | MS2 forward | 864.796968  | 11.01529167 | 24948.29431 | 7.15%  |
| TG(16:1/18:3/18:3) | MS2 reverse | 866.7221708 | 9.466058333 | 334593.6174 | 4.85%  |
| TG(16:0/18:3/18:3) | MS2 forward | 868.7263692 | 9.454083333 | 54079.00712 | 4.93%  |



|                    |             |             |             |             |       |
|--------------------|-------------|-------------|-------------|-------------|-------|
| TG(16:0/18:2/18:3) | MS2 forward | 870.7535518 | 10.08251667 | 4494057.924 | 2.52% |
| TG(16:1/18:1/18:2) | MS2 forward | 872.7593388 | 10.06646667 | 693937.6398 | 1.28% |
| TG(16:0/18:2/18:2) | MS2 forward | 872.7692381 | 10.3655     | 8559037.303 | 0.85% |
| TG(16:0/18:1/18:2) | MS2 forward | 874.7848201 | 10.62174167 | 8495671.667 | 1.66% |
| TG(18:1/16:0/18:1) | MS2 forward | 876.8005275 | 10.881175   | 7259631.923 | 3.19% |
| TG(16:0/18:0/18:1) | MS2 forward | 878.8059464 | 10.88351667 | 1187921.284 | 2.13% |
| TG(17:2/18:2/18:3) | MS2 reverse | 880.7413236 | 10.6087     | 59984.46871 | 7.02% |
| TG(17:1/18:1/18:3) | MS2 forward | 884.7677111 | 10.23484167 | 124921.672  | 2.49% |
| TG(17:1/18:1/18:2) | MS2 forward | 886.7727457 | 10.21459167 | 24518.88118 | 4.72% |
| TG(17:0/18:1/18:3) | MS2 forward | 886.782975  | 10.51376667 | 265013.9499 | 2.52% |
| TG(17:0/18:1/18:2) | MS2 forward | 888.788987  | 10.48425    | 53218.79422 | 0.64% |
| TG(17:1/18:1/18:1) | MS2 forward | 888.7993168 | 10.77790833 | 433153.8727 | 9.58% |
| TG(18:3/18:3/18:3) | MS2 forward | 890.7255904 | 9.180308333 | 347439.1932 | 6.26% |
| TG(17:0/18:1/18:1) | MS2 forward | 890.8054006 | 10.76278333 | 82924.55734 | 4.60% |
| TG(18:2/18:3/18:3) | MS2 forward | 892.7386689 | 9.498558333 | 1513233.289 | 5.44% |
| TG(17:0/18:0/18:1) | MS2 forward | 892.8199381 | 11.02863333 | 45548.5344  | 5.40% |
| TG(18:2/18:2/18:3) | MS2 forward | 894.7442286 | 9.493366667 | 254710.8566 | 6.34% |
| TG(18:1/18:3/18:3) | MS2 forward | 894.7534587 | 9.815583333 | 9813496.064 | 3.82% |
| TG(18:1/18:2/18:3) | MS2 forward | 896.7600772 | 9.80075     | 1625403.055 | 4.13% |
| TG(18:1/18:2/18:2) | MS2 forward | 898.7854999 | 10.38483333 | 37943941.34 | 4.18% |
| TG(18:1/18:1/18:2) | MS2 forward | 900.779817  | 10.06725    | 101844.0454 | 3.31% |
| TG(18:1/18:1/18:1) | MS2 forward | 902.8160639 | 10.89695    | 38343654.31 | 5.15% |
| TG(16:0/18:1/20:1) | MS2 forward | 904.8227823 | 10.890175   | 6203701.36  | 4.66% |
| TG(18:0/18:1/18:1) | MS2 forward | 904.8312917 | 11.14600833 | 6904569.096 | 6.21% |
| TG(18:0/18:0/18:1) | MS2 forward | 906.8371014 | 11.14654167 | 1403638.453 | 2.48% |
| TG(17:0/18:3/20:4) | MS2 reverse | 908.7717719 | 10.88315    | 121381.5346 | 5.87% |
| TG(17:2/18:3/20:1) | MS2 reverse | 910.7814151 | 10.29813333 | 46150.3454  | 1.88% |
| TG(18:3/18:3/19:0) | MS2 reverse | 910.7875852 | 10.68093333 | 17585.36041 | 2.02% |
| TG(17:1/18:3/20:1) | MS2 reverse | 912.7986096 | 10.558325   | 179230.7214 | 2.07% |
| TG(18:2/18:2/19:0) | MS2 reverse | 914.814856  | 10.80351667 | 487586.418  | 0.06% |
| TG(17:0/18:1/20:1) | MS2 forward | 918.8349304 | 11.03040833 | 108501.9972 | 5.05% |
| TG(17:2/19:0/19:0) | MS2 reverse | 918.8453286 | 10.60456667 | 150737.8416 | 1.42% |
| TG(17:1/19:0/19:0) | MS2 reverse | 920.8494741 | 11.27480833 | 45607.4559  | 1.93% |
| TG(18:3/18:3/20:1) | MS2 forward | 922.784322  | 10.16993333 | 2242007.113 | 3.33% |
| TG(18:2/18:3/20:1) | MS2 forward | 924.789163  | 10.1473     | 424714.7678 | 2.22% |
| TG(18:1/18:3/20:1) | MS2 forward | 926.816476  | 10.6939     | 11830835.91 | 3.69% |
| TG(18:1/18:2/20:1) | MS2 forward | 928.8210903 | 10.36868333 | 70323.30525 | 0.85% |
| TG(18:1/18:1/20:1) | MS2 forward | 930.8470069 | 11.15171667 | 20026482.52 | 8.38% |
| TG(16:0/18:1/22:1) | MS2 forward | 932.8532558 | 11.14323333 | 3379969.003 | 4.01% |
| TG(18:0/18:1/20:0) | MS2 forward | 934.8681814 | 11.38160833 | 1165506.118 | 4.56% |
| TG(18:2/19:0/20:3) | MS2 reverse | 940.8186338 | 9.772458333 | 38633.47531 | 7.76% |
| TG(17:1/18:2/22:1) | MS2 forward | 942.8458034 | 11.06851667 | 378039.4795 | 2.44% |
| TG(18:3/18:3/22:3) | MS2 reverse | 946.7636616 | 8.741208333 | 6665.047727 | 0.98% |
| TG(18:3/18:3/22:2) | MS2 reverse | 948.7990733 | 10.1846     | 81567.01644 | 3.07% |

|                    |             |             |             |             |        |
|--------------------|-------------|-------------|-------------|-------------|--------|
| TG(18:2/18:3/22:3) | MS2 forward | 948.8117737 | 10.47931667 | 25527.86077 | 4.37%  |
| TG(18:3/18:3/22:1) | MS2 forward | 950.8164148 | 10.48460833 | 5512225.413 | 3.70%  |
| TG(18:2/18:3/22:1) | MS2 forward | 952.831386  | 10.72923333 | 10103852.92 | 1.37%  |
| TG(18:1/18:3/22:1) | MS2 forward | 954.8372946 | 10.69336667 | 1875767.675 | 3.21%  |
| TG(18:3/20:1/20:1) | MS2 reverse | 954.8416743 | 10.39726667 | 149077.02   | 0.90%  |
| TG(18:1/18:2/22:1) | MS2 forward | 956.8526368 | 10.94063333 | 3830877.125 | 3.19%  |
| TG(18:1/18:1/22:1) | MS2 forward | 958.8679173 | 11.1442     | 3426164.538 | 5.09%  |
| TG(18:0/18:1/22:1) | MS2 forward | 960.884845  | 11.38441667 | 3915597.826 | 4.72%  |
| TG(18:0/18:1/22:0) | MS2 forward | 962.8970483 | 11.618225   | 510105.838  | 7.11%  |
| TG(17:2/20:1/22:2) | MS2 reverse | 968.8609345 | 11.08464167 | 215353.1273 | 3.19%  |
| TG(17:1/20:1/22:1) | MS2 reverse | 972.8913482 | 11.51084167 | 363511.9781 | 4.69%  |
| TG(18:1/19:0/22:1) | MS2 reverse | 974.9075307 | 11.14803333 | 564633.3192 | 0.38%  |
| TG(18:3/20:3/22:2) | MS2 reverse | 976.8275448 | 10.4693     | 26812.22744 | 6.88%  |
| TG(18:0/19:0/22:1) | MS2 reverse | 976.9139459 | 11.14955    | 119907.0877 | 1.83%  |
| TG(16:0/21:0/22:1) | MS2 reverse | 976.9208484 | 11.95729167 | 12003.80307 | 3.26%  |
| TG(18:3/20:3/22:1) | MS2 forward | 978.8455185 | 10.76196667 | 626090.925  | 7.19%  |
| TG(18:3/20:2/22:1) | MS2 forward | 980.8510792 | 10.72125    | 159612.2175 | 5.09%  |
| TG(18:3/20:1/22:1) | MS2 forward | 982.8783353 | 11.21989167 | 18248724.36 | 5.68%  |
| TG(18:2/20:1/22:1) | MS2 forward | 984.8839504 | 11.18759167 | 3555859.915 | 1.45%  |
| TG(18:1/20:1/22:1) | MS2 forward | 986.9001768 | 11.36273333 | 2581727.908 | 0.90%  |
| TG(18:1/20:0/22:1) | MS2 forward | 988.9132773 | 10.89770833 | 153235.5239 | 5.14%  |
| TG(18:1/20:0/22:0) | MS2 forward | 990.9279466 | 11.14915    | 57469.77117 | 2.85%  |
| TG(20:2/20:5/21:0) | MS2 reverse | 992.8667073 | 9.824533333 | 43234.23691 | 4.74%  |
| TG(18:0/22:6/22:6) | MS2 reverse | 996.7827139 | 9.4928      | 3129.848536 | 8.72%  |
| TG(17:2/22:1/22:2) | MS2 reverse | 996.8924375 | 11.318975   | 294231.108  | 1.83%  |
| TG(18:3/22:1/22:6) | MS2 reverse | 1000.849262 | 8.776316667 | 19200.42243 | 4.69%  |
| TG(20:0/20:3/22:6) | MS2 reverse | 1002.829891 | 10.39736667 | 20379.25482 | 3.49%  |
| TG(18:3/22:1/22:3) | MS2 forward | 1006.868346 | 10.47815833 | 24035.25836 | 5.16%  |
| TG(18:3/22:1/22:2) | MS2 forward | 1008.889596 | 10.72253333 | 41183.73495 | 3.91%  |
| TG(18:3/22:1/22:1) | MS2 forward | 1010.90971  | 11.45134167 | 25752964.64 | 4.55%  |
| TG(18:0/22:2/22:2) | MS2 reverse | 1012.911689 | 10.67775    | 78229.3609  | 6.49%  |
| TG(18:2/22:1/22:1) | MS2 forward | 1012.924695 | 11.62505    | 28600224.84 | 1.85%  |
| TG(18:1/22:0/22:1) | MS2 forward | 1016.942958 | 11.14600833 | 93621.87955 | 8.20%  |
| TG(18:0/22:1/22:1) | MS2 reverse | 1016.955676 | 12.0478     | 3680101.07  | 5.19%  |
| TG(18:1/22:0/22:0) | MS2 forward | 1018.963142 | 12.03451667 | 750978.566  | 4.54%  |
| TG(19:0/22:1/22:4) | MS2 reverse | 1024.922343 | 11.53728333 | 127731.3579 | 4.17%  |
| TG(19:0/22:1/22:2) | MS2 reverse | 1028.954371 | 11.92829167 | 276633.8655 | 12.61% |
| TG(20:3/22:1/22:3) | MS2 reverse | 1034.899011 | 11.23408333 | 40949.52263 | 7.70%  |
| TG(20:4/22:1/22:1) | MS2 reverse | 1036.918737 | 11.45251667 | 53289.4515  | 3.32%  |
| TG(20:3/22:1/22:1) | MS2 reverse | 1038.93633  | 11.23494167 | 59548.43729 | 8.85%  |
| TG(20:2/22:1/22:1) | MS2 reverse | 1040.953376 | 11.85595833 | 1747591.639 | 9.97%  |
| TG(20:0/22:1/22:1) | MS2 reverse | 1044.980322 | 12.0201     | 1436994.98  | 4.70%  |
| TG(21:0/22:1/22:2) | MS2 reverse | 1056.984028 | 12.12528333 | 49242.24847 | 1.61%  |
| TG(22:1/22:1/22:3) | MS2 reverse | 1066.965676 | 11.86625833 | 44891.21949 | 5.14%  |

| MS2 name      | type        | mzmed       | time        | ng/ml       | RSD   |
|---------------|-------------|-------------|-------------|-------------|-------|
| PC(16:0/18:1) | MS2 forward | 804.5743443 | 6.31265     | 1060.526004 | 1.78% |
| PC(18:2/18:2) | MS2 forward | 826.5581574 | 5.167275    | 1255.54518  | 5.10% |
| PC(18:2/18:1) | MS2 forward | 828.5731233 | 5.791516667 | 1564.199937 | 2.28% |
| PC(18:1/18:1) | MS2 forward | 830.5896363 | 6.374858333 | 2945.749913 | 3.01% |
| PE(16:0/14:0) | MS2 forward | 662.4750311 | 5.93505     | 2519.306368 | 6.91% |
| PE(16:0/16:0) | MS2 forward | 690.5063846 | 6.330608333 | 3075.86022  | 5.44% |
| PE(16:0/17:1) | MS2 forward | 702.5071503 | 5.947308333 | 45868.43312 | 4.19% |
| PE(17:1/17:1) | MS2 forward | 714.5131409 | 5.414375    | 2480.97404  | 1.12% |
| PE(16:0/18:1) | MS2 forward | 716.5222366 | 5.967116667 | 1893.039303 | 2.56% |
| PE(18:0/16:0) | MS2 forward | 718.5301253 | 5.19735     | 975.9365755 | 6.71% |
| PE(17:1/18:0) | MS2 reverse | 730.5367786 | 13.26111667 | 1204.24594  | 3.90% |
| PE(18:0/17:1) | MS2 reverse | 730.5377207 | 6.588833333 | 8789.49236  | 7.42% |
| PE(18:2/18:2) | MS2 forward | 738.5074106 | 5.243908333 | 1451.960427 | 2.24% |
| PE(18:2/18:1) | MS2 forward | 740.522175  | 5.83385     | 1757.210073 | 4.75% |
| PE(18:1/18:1) | MS2 forward | 742.5377065 | 6.405616667 | 4200.483049 | 4.08% |
| PE(20:1/18:3) | MS2 reverse | 766.5455011 | 6.018708333 | 658.85293   | 1.31% |
| PE(21:0/17:1) | MS2 reverse | 772.591064  | 5.719283333 | 506.7949301 | 4.14% |
| PE(17:2/22:1) | MS2 reverse | 782.5856997 | 4.322       | 761.4066836 | 5.09% |
| PG(20:4/18:3) | MS2 forward | 791.4929445 | 3.818308333 | 2450.980896 | 4.95% |
| PG(20:4/18:2) | MS2 reverse | 793.5091577 | 4.365466667 | 1031.499423 | 5.05% |
| PG(20:3/18:2) | MS2 forward | 795.5246575 | 4.932258333 | 909.6564819 | 5.27% |
| PA(18:2/14:0) | MS2 forward | 643.4240976 | 2.068525    | 1752.23775  | 1.57% |
| PA(16:0/17:1) | MS2 forward | 659.4762842 | 5.629016667 | 1831.219089 | 2.27% |
| PA(16:0/18:3) | MS2 forward | 669.4497055 | 4.6866      | 1080.142348 | 4.39% |
| PA(16:0/18:2) | MS2 forward | 671.4643165 | 5.22885     | 1989.995882 | 8.00% |
| PA(16:0/18:1) | MS2 forward | 673.4806193 | 5.929966667 | 1203.801531 | 2.61% |
| PA(18:2/18:2) | MS2 forward | 695.4653133 | 4.745158333 | 5105.310441 | 9.24% |
| PA(18:1/18:2) | MS2 forward | 697.4808425 | 5.275333333 | 3466.655949 | 7.92% |
| PA(18:1/18:1) | MS2 forward | 699.4969443 | 5.945808333 | 4440.351808 | 2.09% |
| PA(16:0/21:0) | MS2 reverse | 717.5288819 | 5.180183333 | 1669.611698 | 8.68% |
| PA(18:0/22:1) | MS2 reverse | 757.5883365 | 8.099258333 | 1709.817712 | 2.81% |
| PA(18:1/25:0) | MS2 forward | 799.6066291 | 6.105025    | 1764.821086 | 0.41% |

**Table S2** Content of PL species of rapeseed oil during light oxidation. (ng/ml )

|              | <b>1</b>          | <b>2</b>         | <b>3</b>         | <b>4</b>         | <b>5</b>          |
|--------------|-------------------|------------------|------------------|------------------|-------------------|
| <b>PC</b>    | 8722.44±565.37    | 7299.61±119.09   | 6207.04±511.40   | 6050.43±117.04   | 7059.83±164.74    |
| <b>PE</b>    | 78123.20±5439.76  | 44001.09±2554.56 | 48301.45±1524.47 | 52803.26±2036.61 | 57120.98±3054.931 |
| <b>PG</b>    | 5172.08±408.32    | 4748.55±101.92   | 4259.72±495.05   | 4112.61±211.98   | 3961.35±207.11    |
| <b>PA</b>    | 17798.09±735.81   | 14882.40±1073.43 | 14332.85±944.27  | 15687.89±577.13  | 82457.60±4078.33  |
| <b>Total</b> | 109815.82±3740.74 | 70931.65±3801.81 | 73101.07±3434.96 | 78654.19±1827.50 | 150599.77±2236.51 |
